# Supplementary material for: Raman Spectroscopy Enables Non-invasive and Confirmatory Diagnostics of Aluminum and Iron Toxicities in Rice
Source: Frontiers journal article supplement (doi:10.3389/fpls.2022.754735), 2022-05-16

# **Raman Spectroscopy Enables Non-Invasive and Confirmatory Diagnostics of Aluminum and Iron Toxicities in Rice**

Samantha Higgins<sup>1</sup>, Sudip Biswas<sup>2</sup>, Nicolas K. Goff<sup>1</sup>, Endang M. Septiningsih<sup>2</sup>, and Dmitry Kurouski<sup>\*1,3</sup>

1. Department of Biochemistry and Biophysics, Texas A&M University, College Station, Texas 77843, United States
2. Department of Soil and Crop Sciences, Texas A&M University, College Station, Texas 77843, United States
3. The Institute for Quantum Science and Engineering, Texas A&M University, College Station, Texas, 77843, United States

**Highlights:** We show that Raman spectroscopy can be used for confirmatory pre-symptomatic diagnostics of high and medium levels of iron and aluminum toxicities in rice.

## **Supporting Information**

\*Note: Nitrogen High and Medium images are excluded for the relevance of the supplementary material.

## Photographs

### Day 2

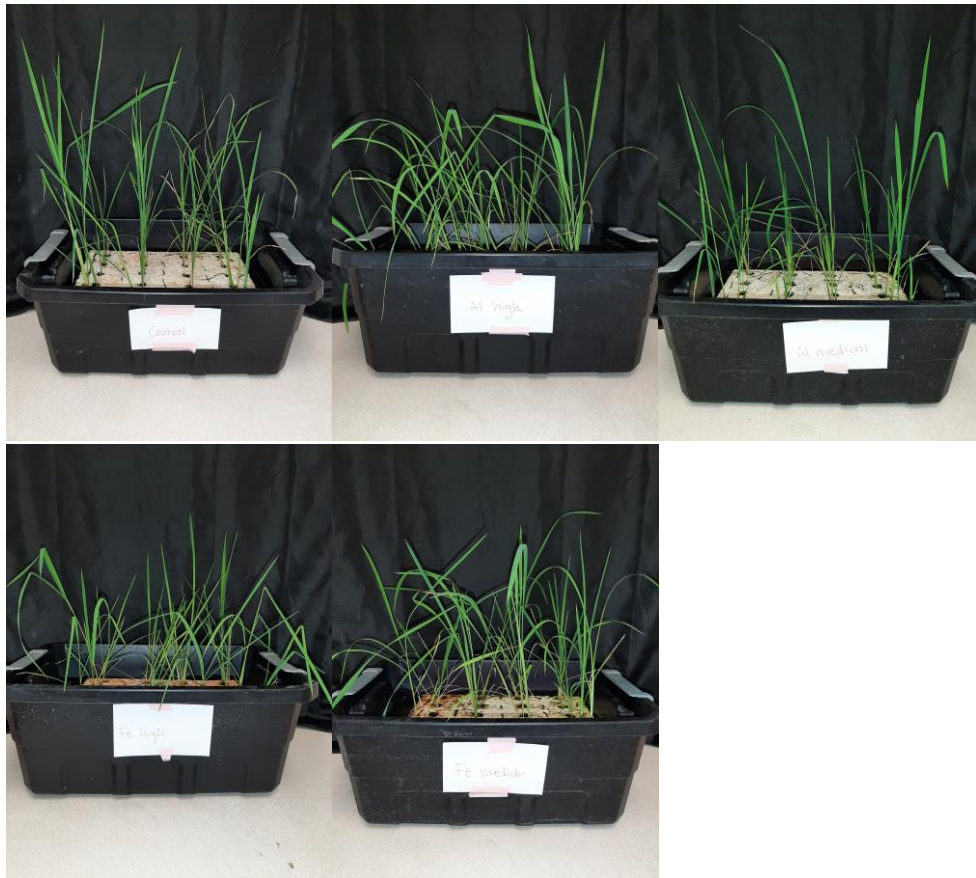

Day 4

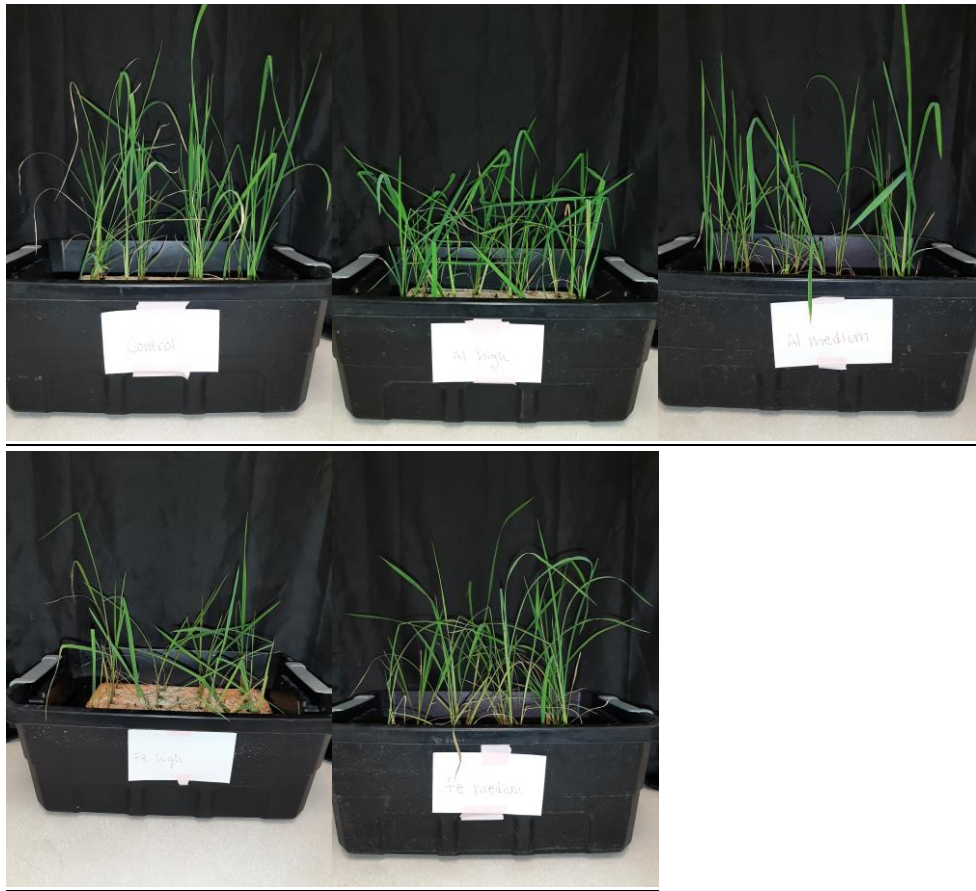

Day 6

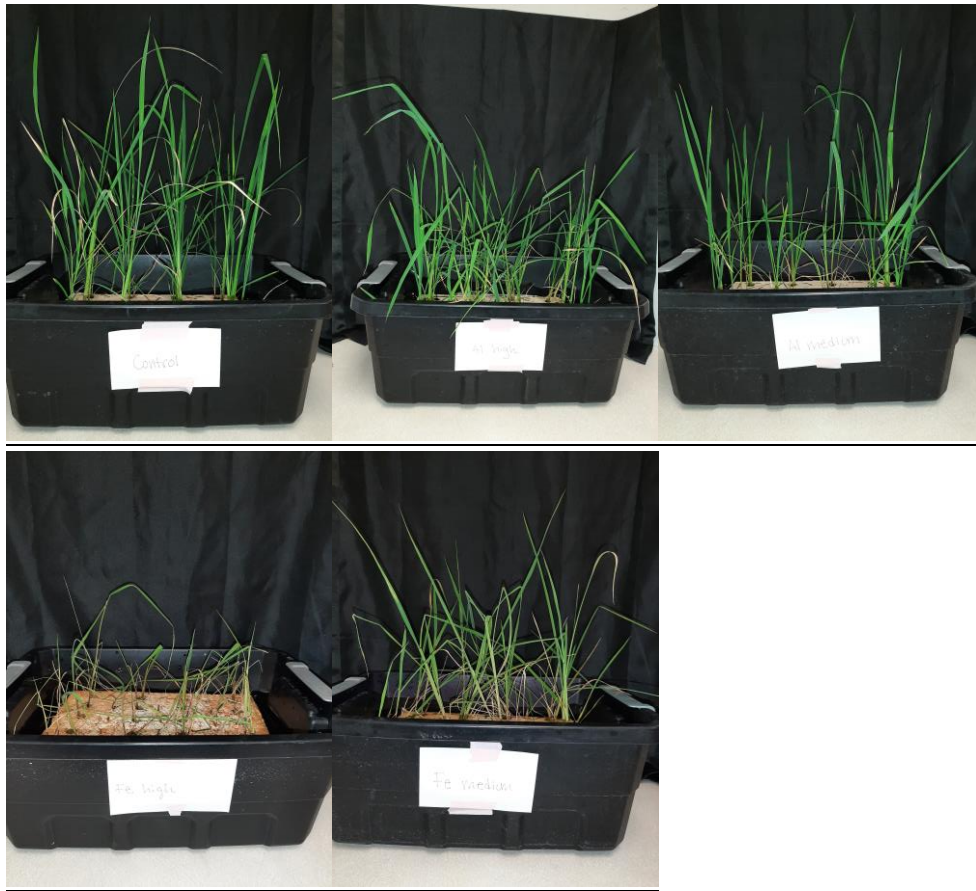

Day 8

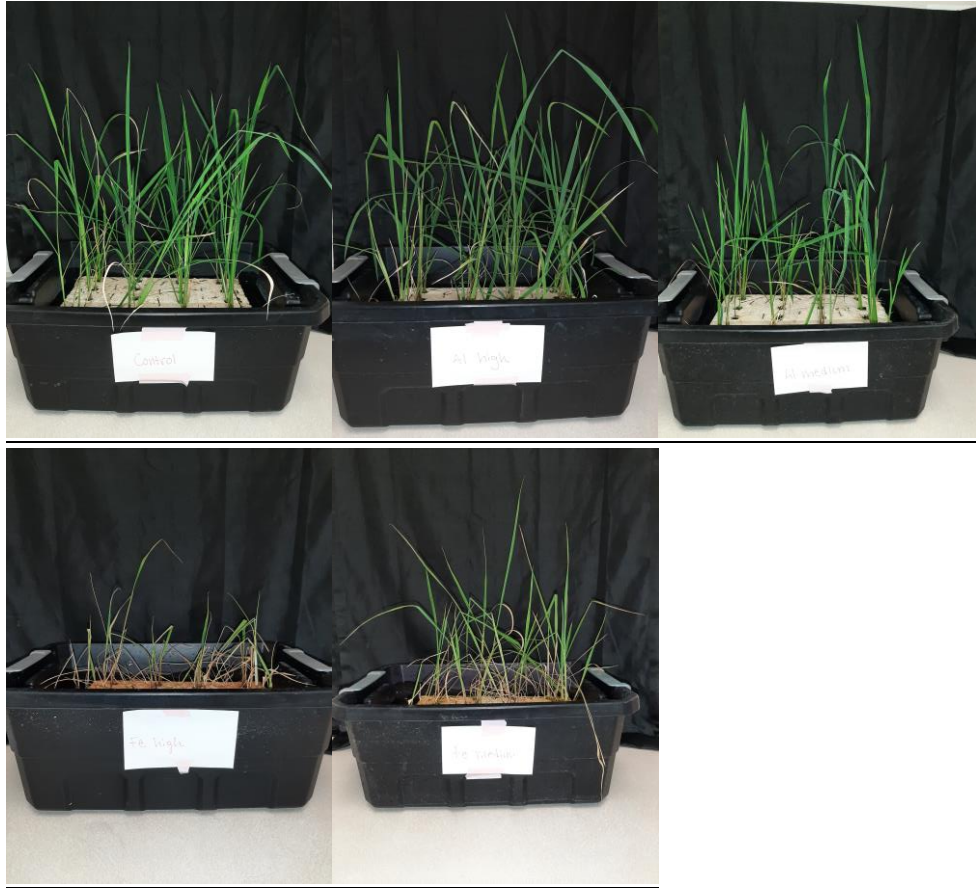



Day 10

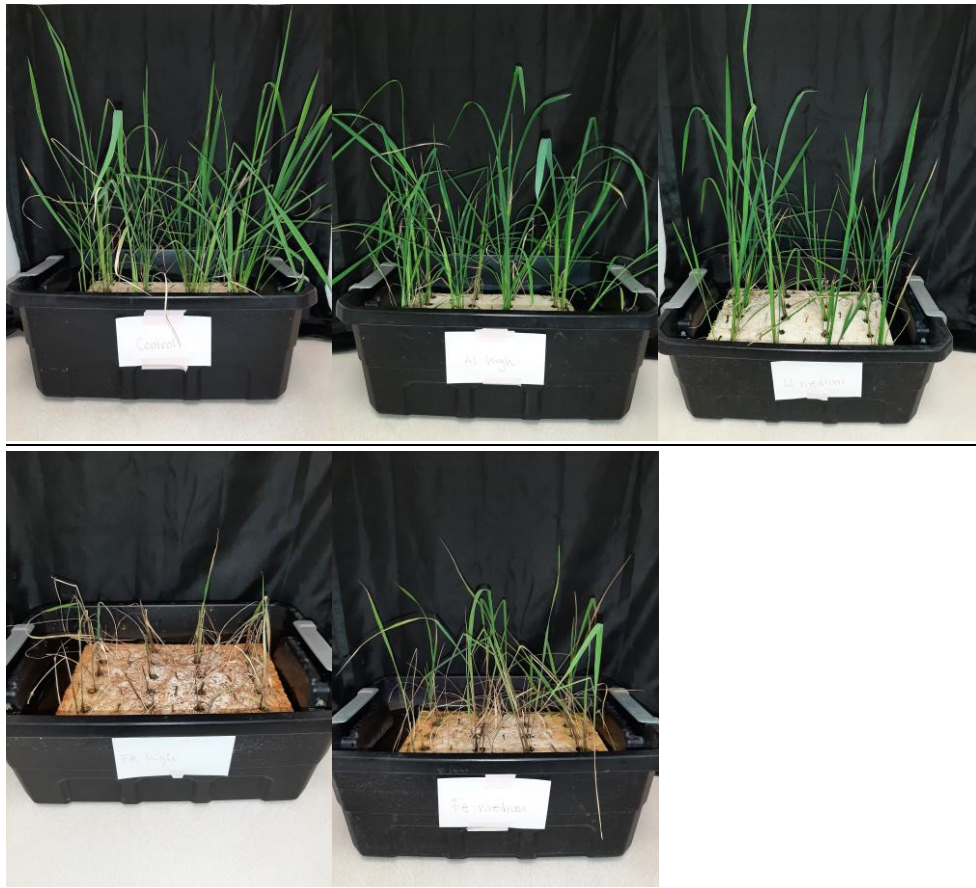

Day 12

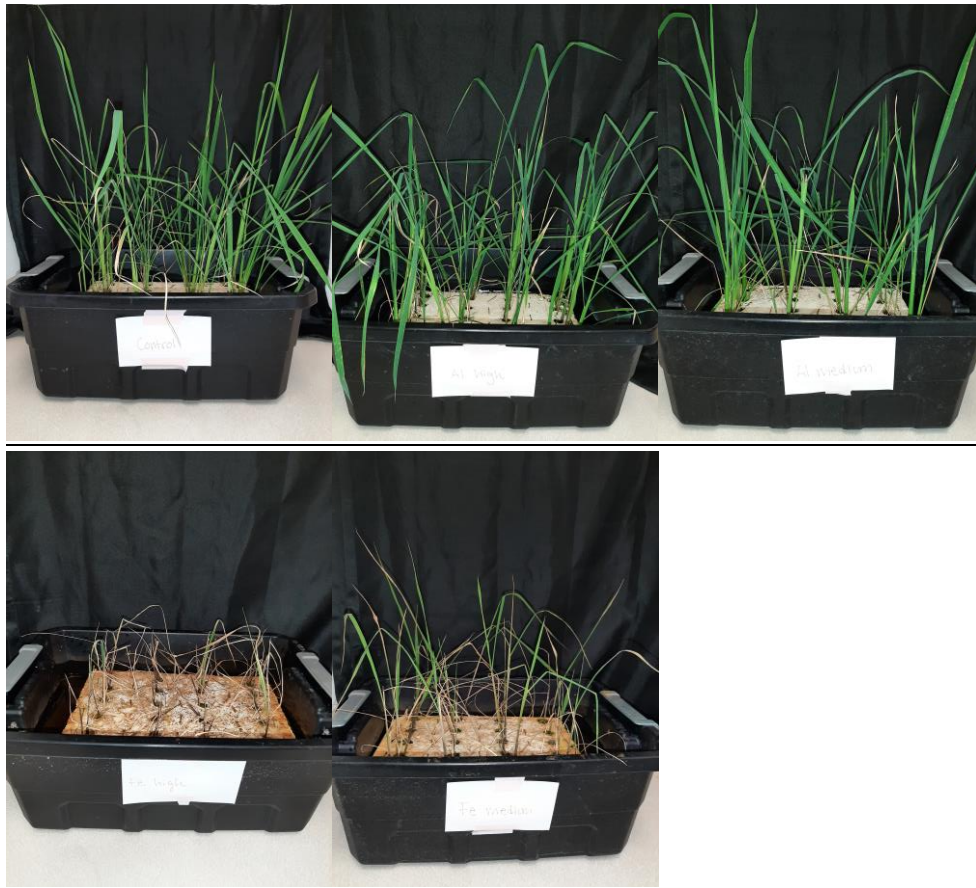

Day 14

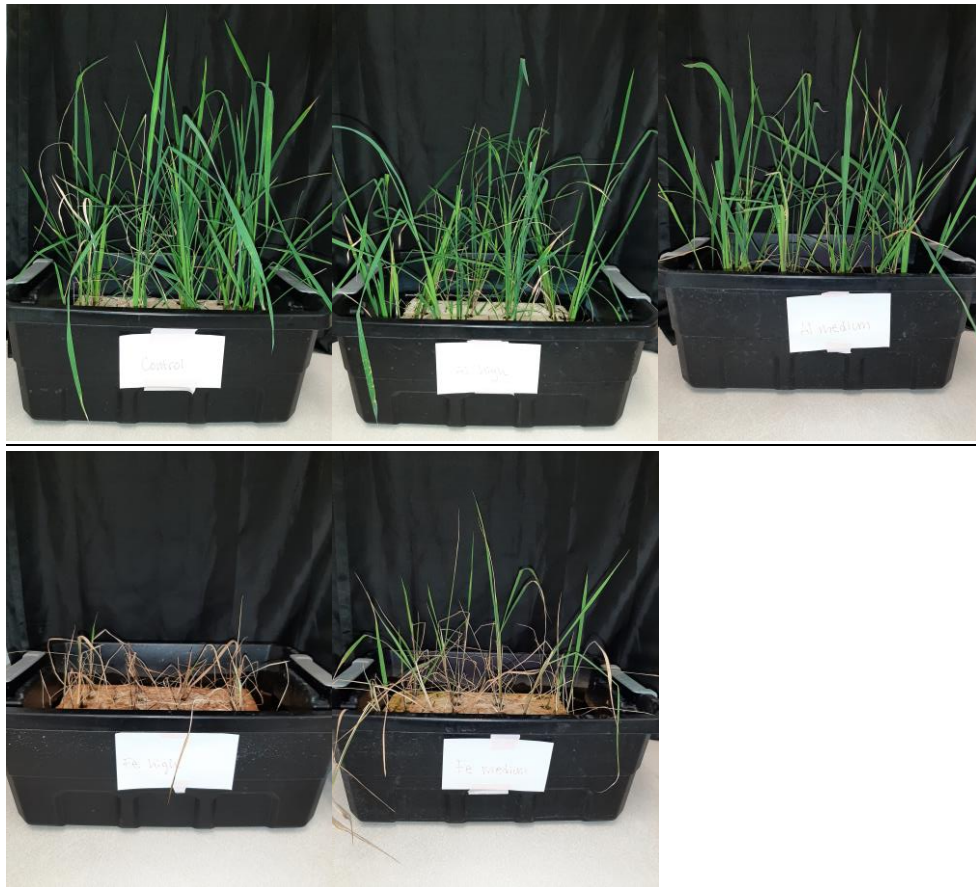



**Figures**

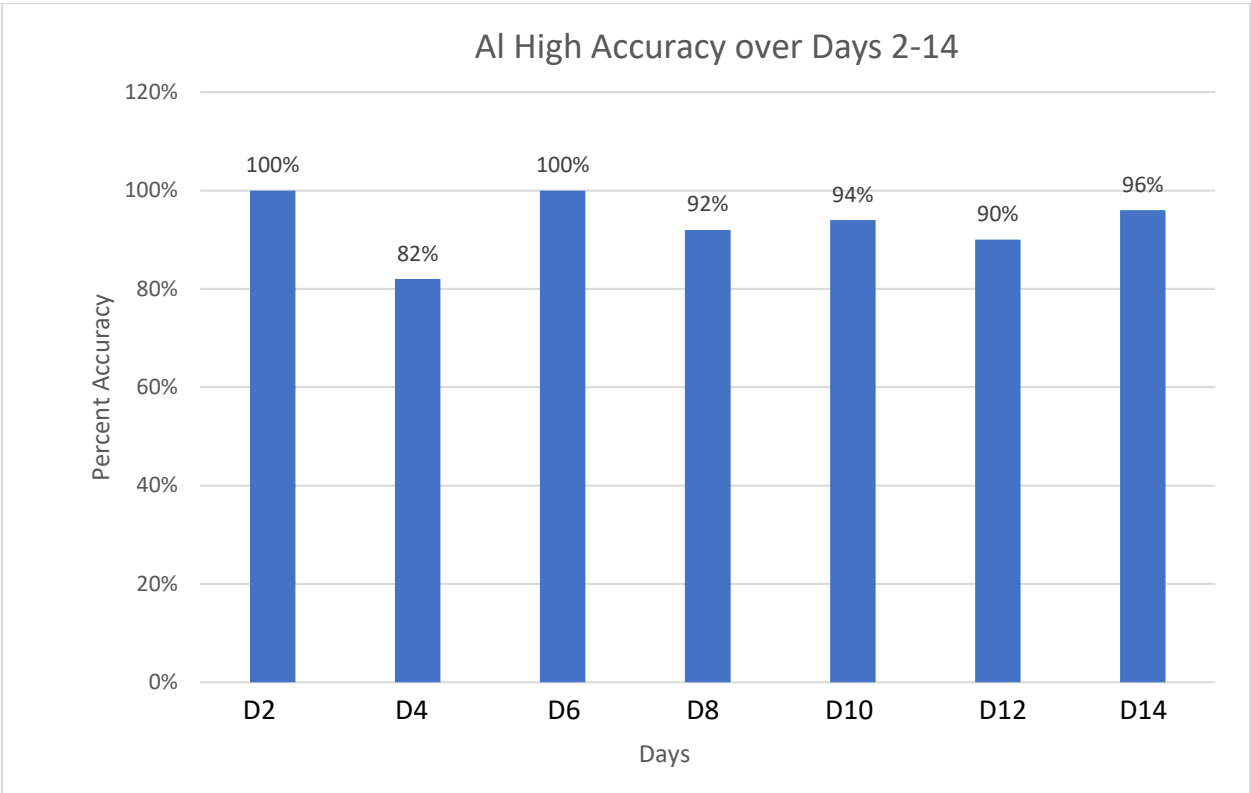

AI Medium Accuracy over Days 2-14

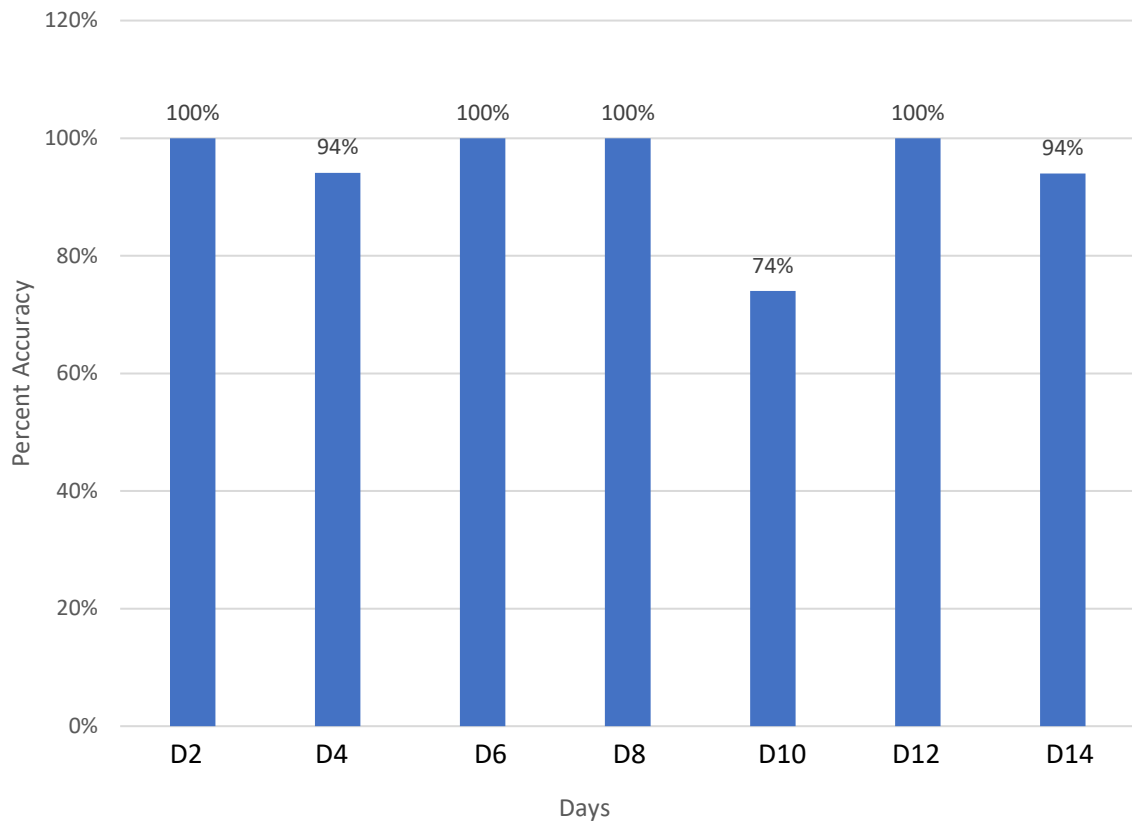

Fe High Accuracy over Days 2-10

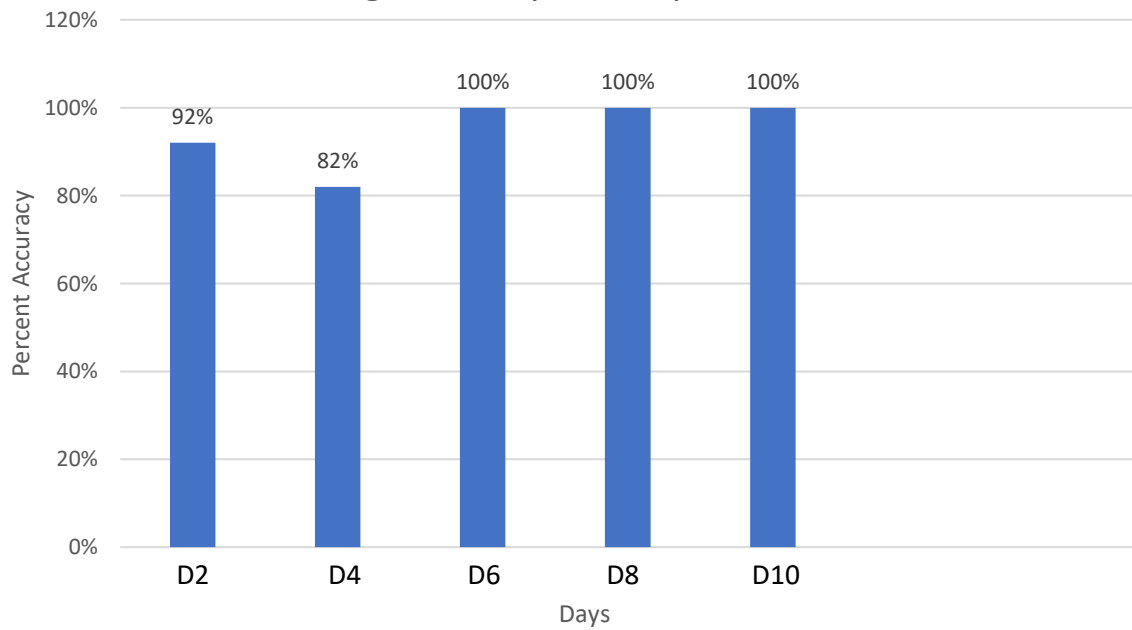

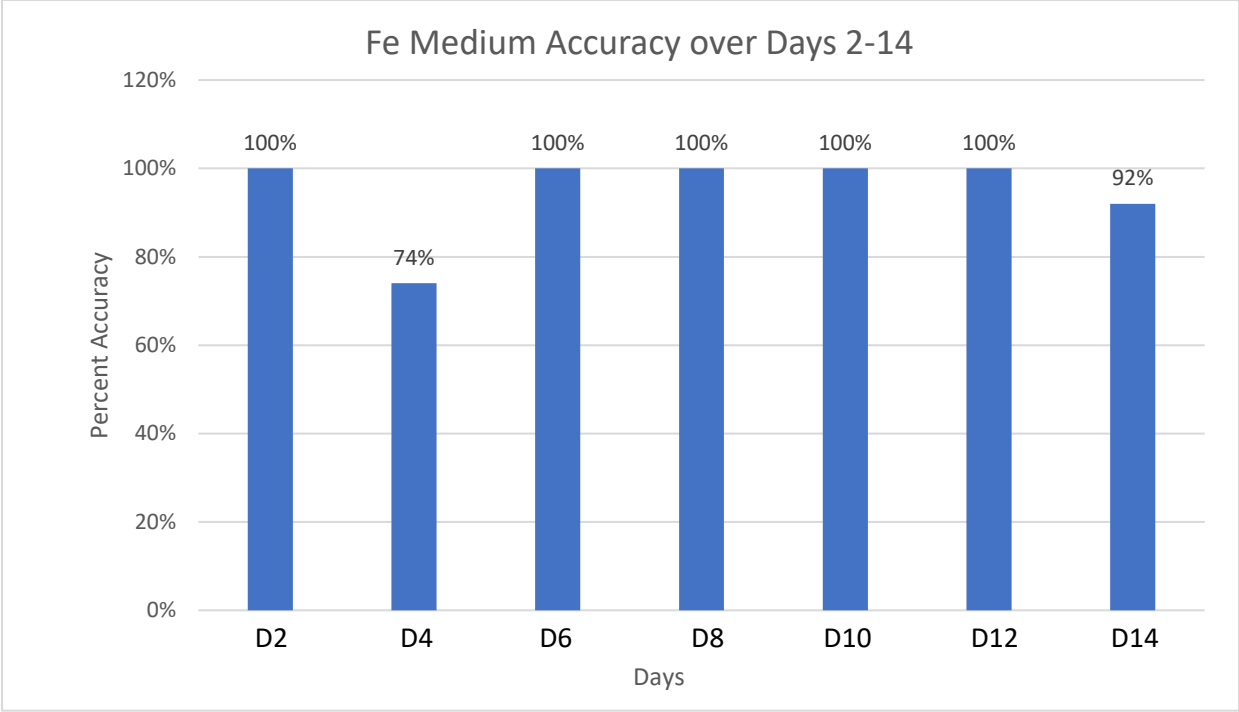

Supplement: Table_1.pdf [file Table_1.pdf]
